# Supplementary material for: Pre-existing anti-drug antibodies in Fabry disease show less affinity for pegunigalsidase alfa
Source: PubMed Central journal article supplement — Mol Ther Methods Clin Dev. 2022 Jul 31;26:323–30. doi: 10.1016/j.omtm.2022.07.009 (PMC9379515; doi:10.1016/j.omtm.2022.07.009), 2022-07-31
Supplement: mmc1.pdf [file mmc1.pdf]

**OMTM, Volume 26**

**Supplemental information**

**Pre-existing anti-drug antibodies  
in Fabry disease show less affinity  
for pegunigalsidase alfa**

**Malte Lenders, Solvey Pollmann, Melina Terlinden, and Eva Brand**

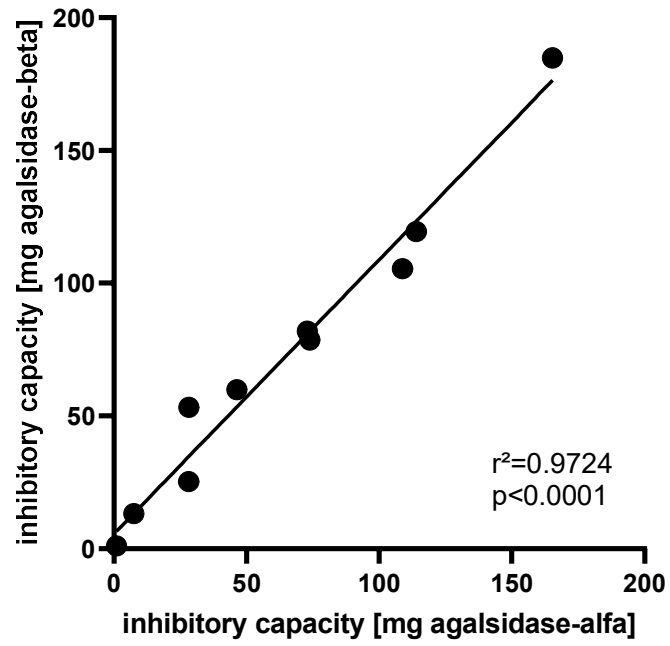

**Supplemental Figure 1: Correlation of individual total inhibitory capacities [mg] of agalsidase-alfa versus agalsidase-beta. N=10.**

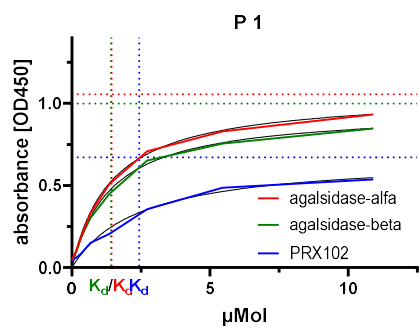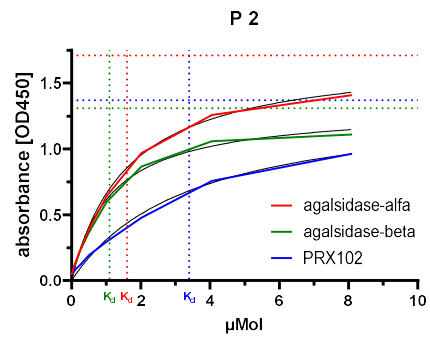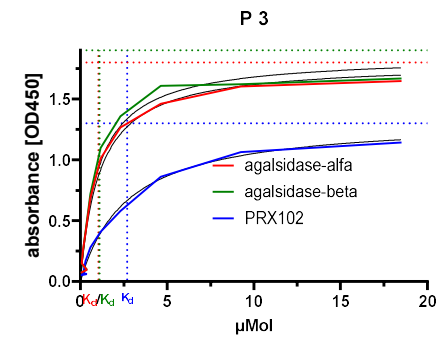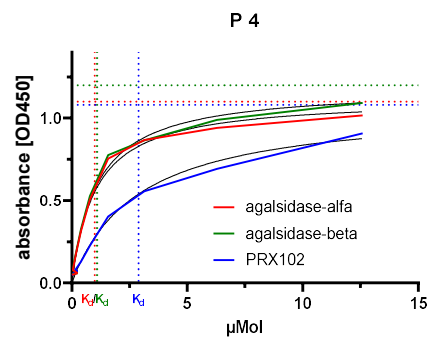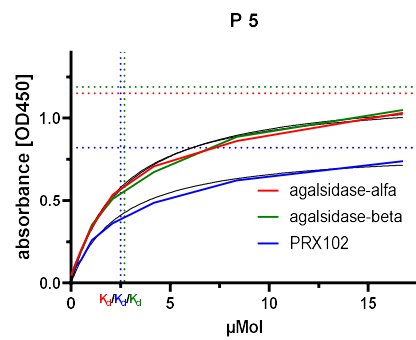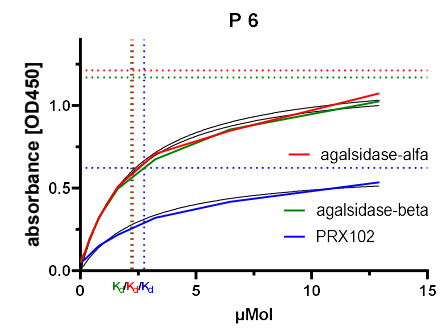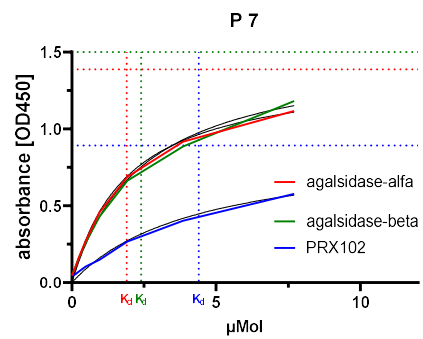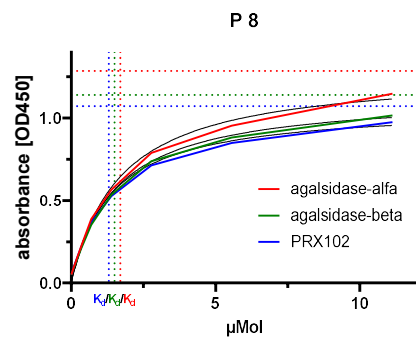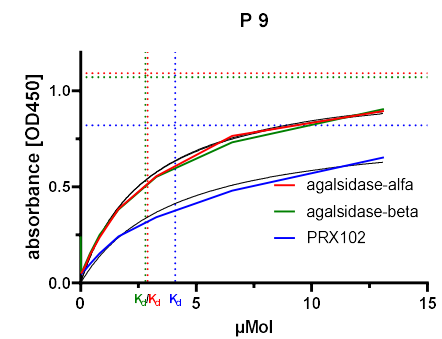

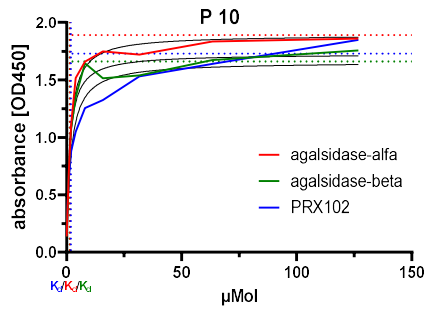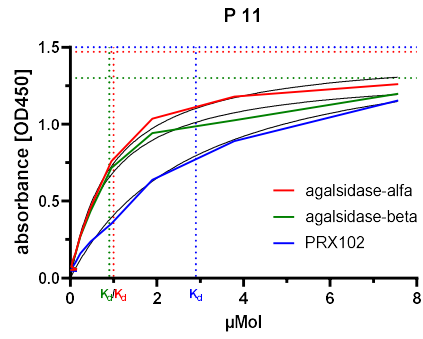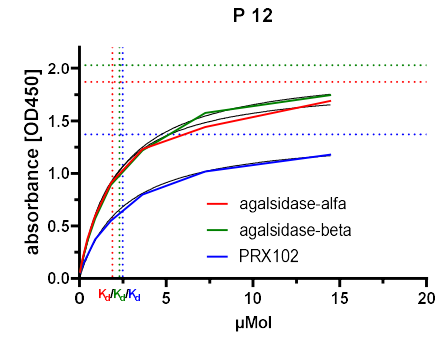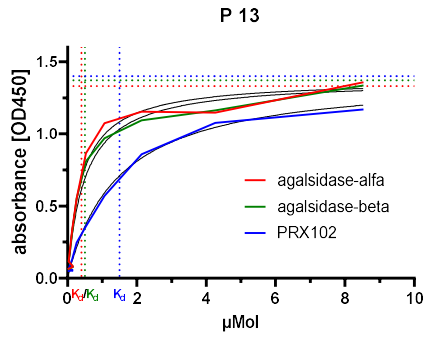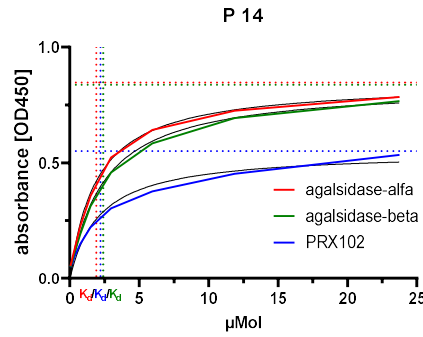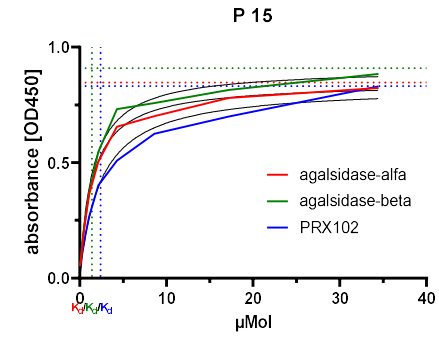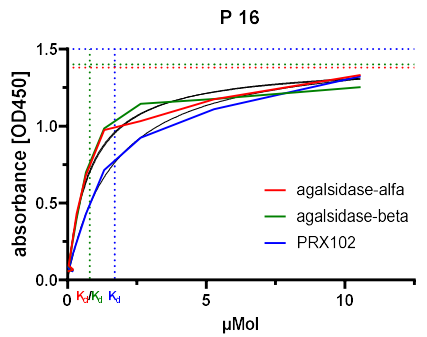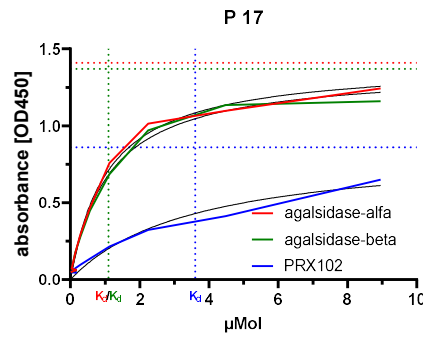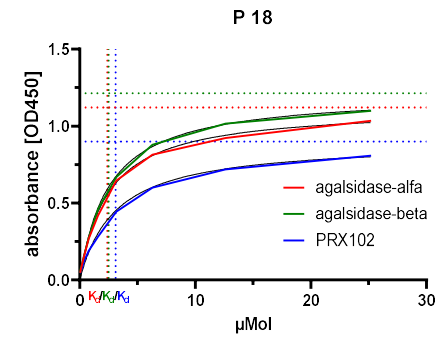

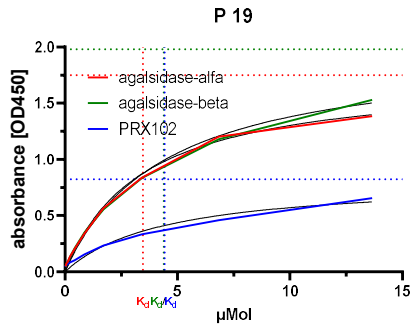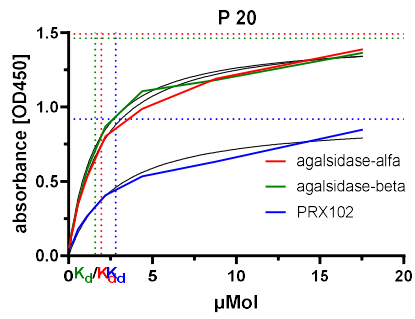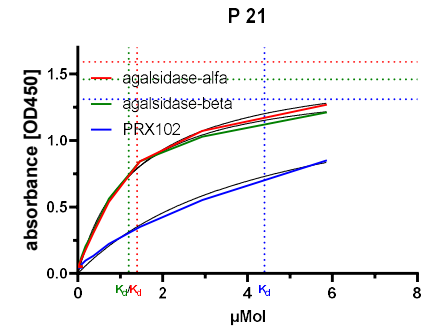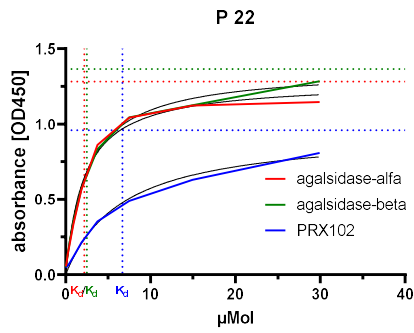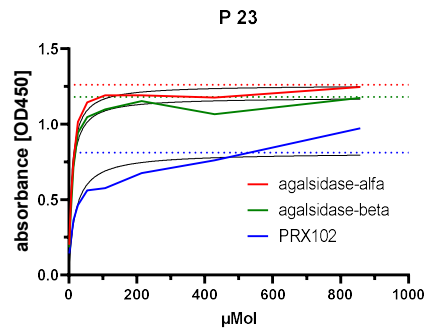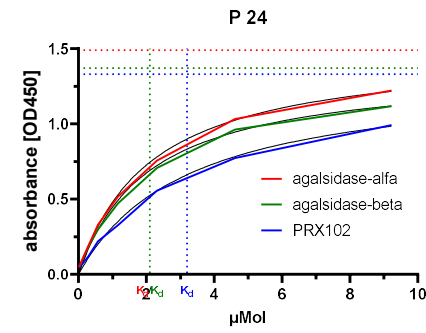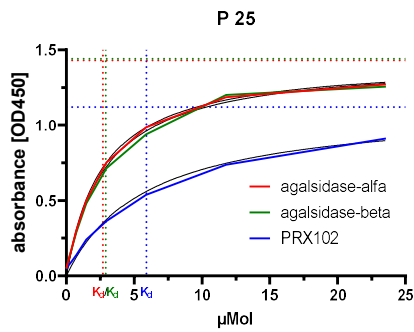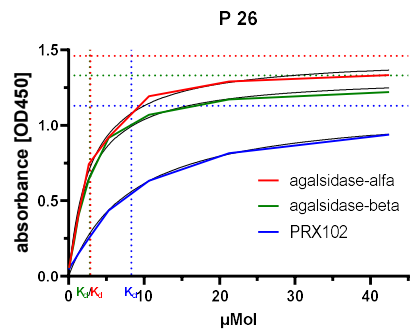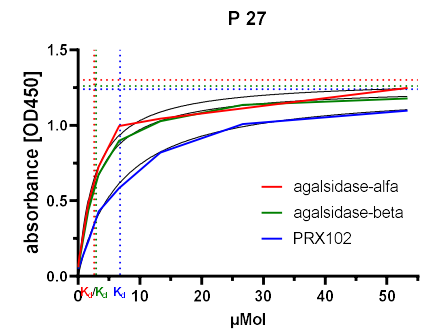

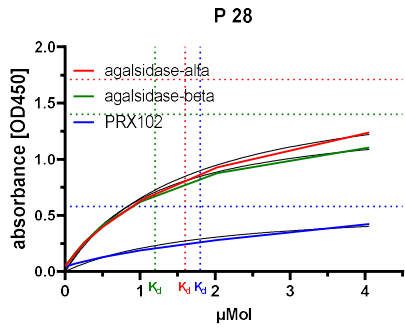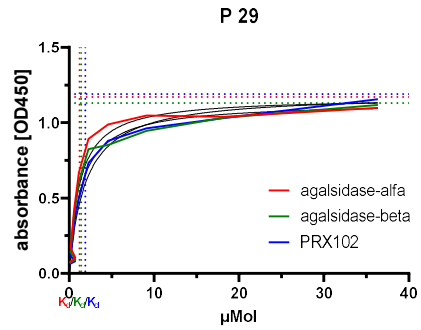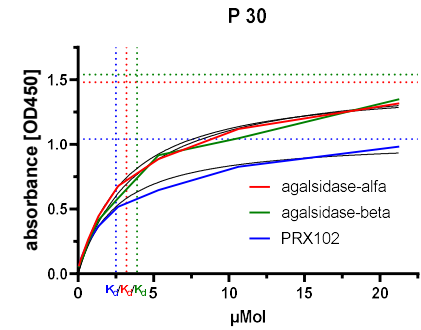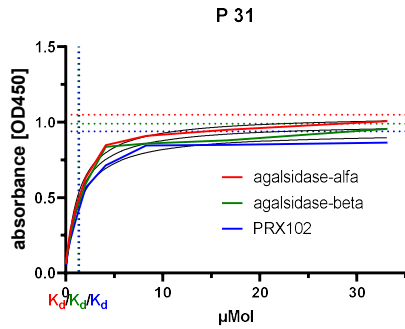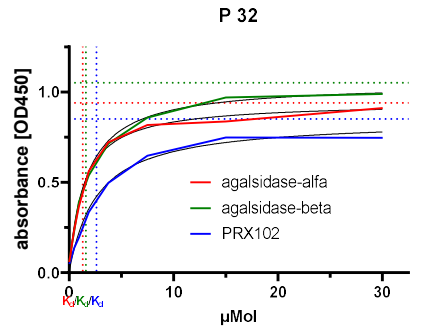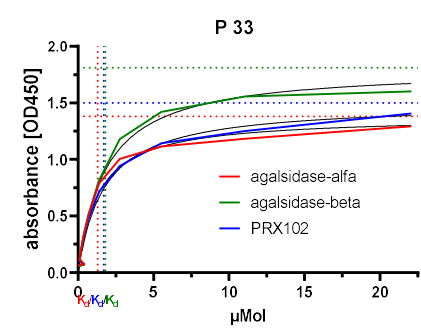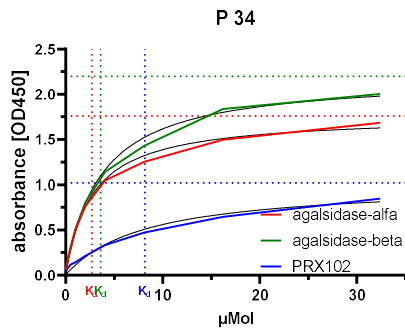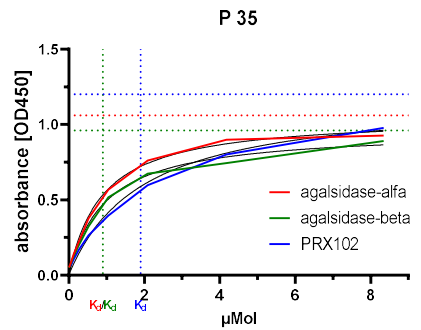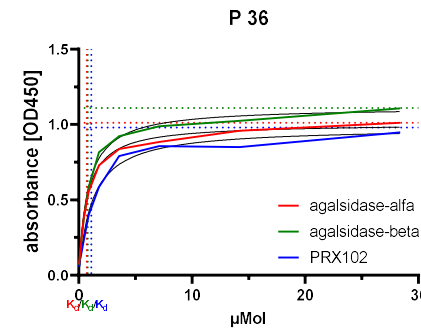

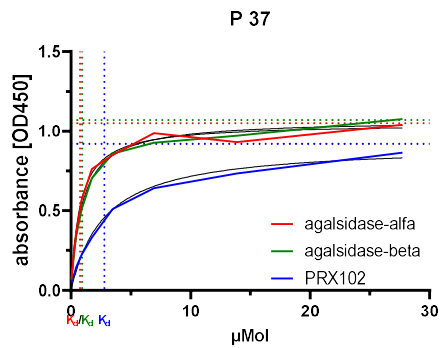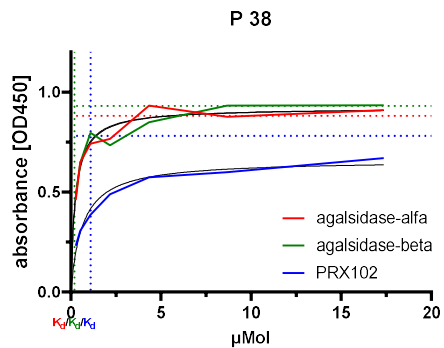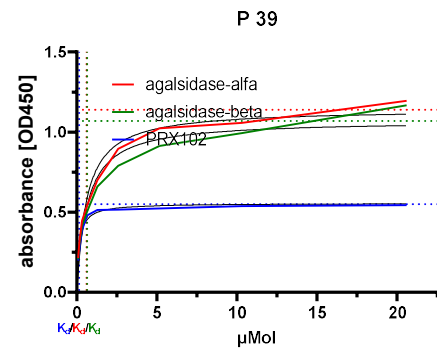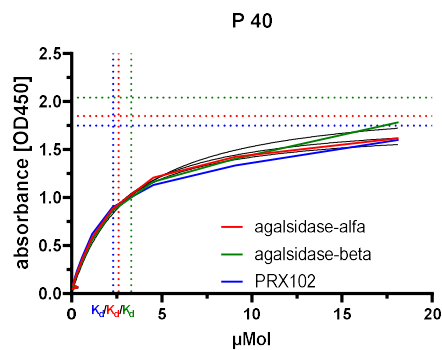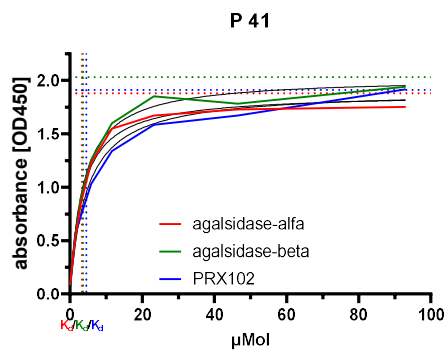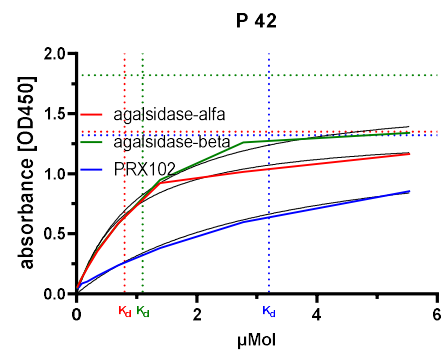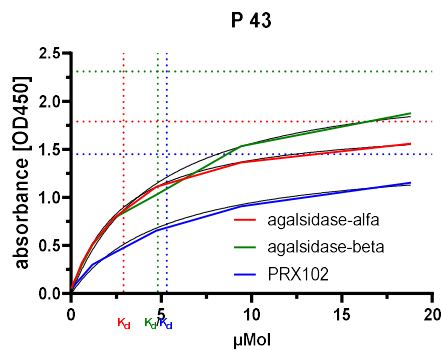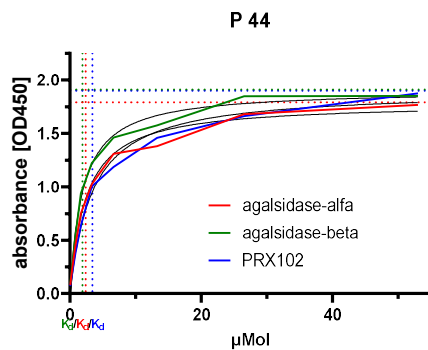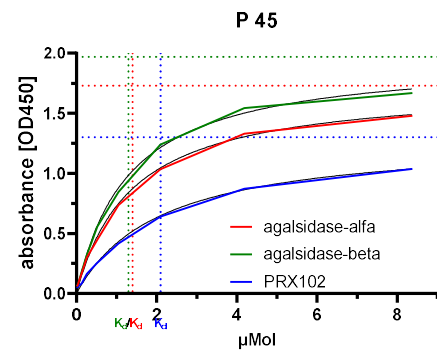

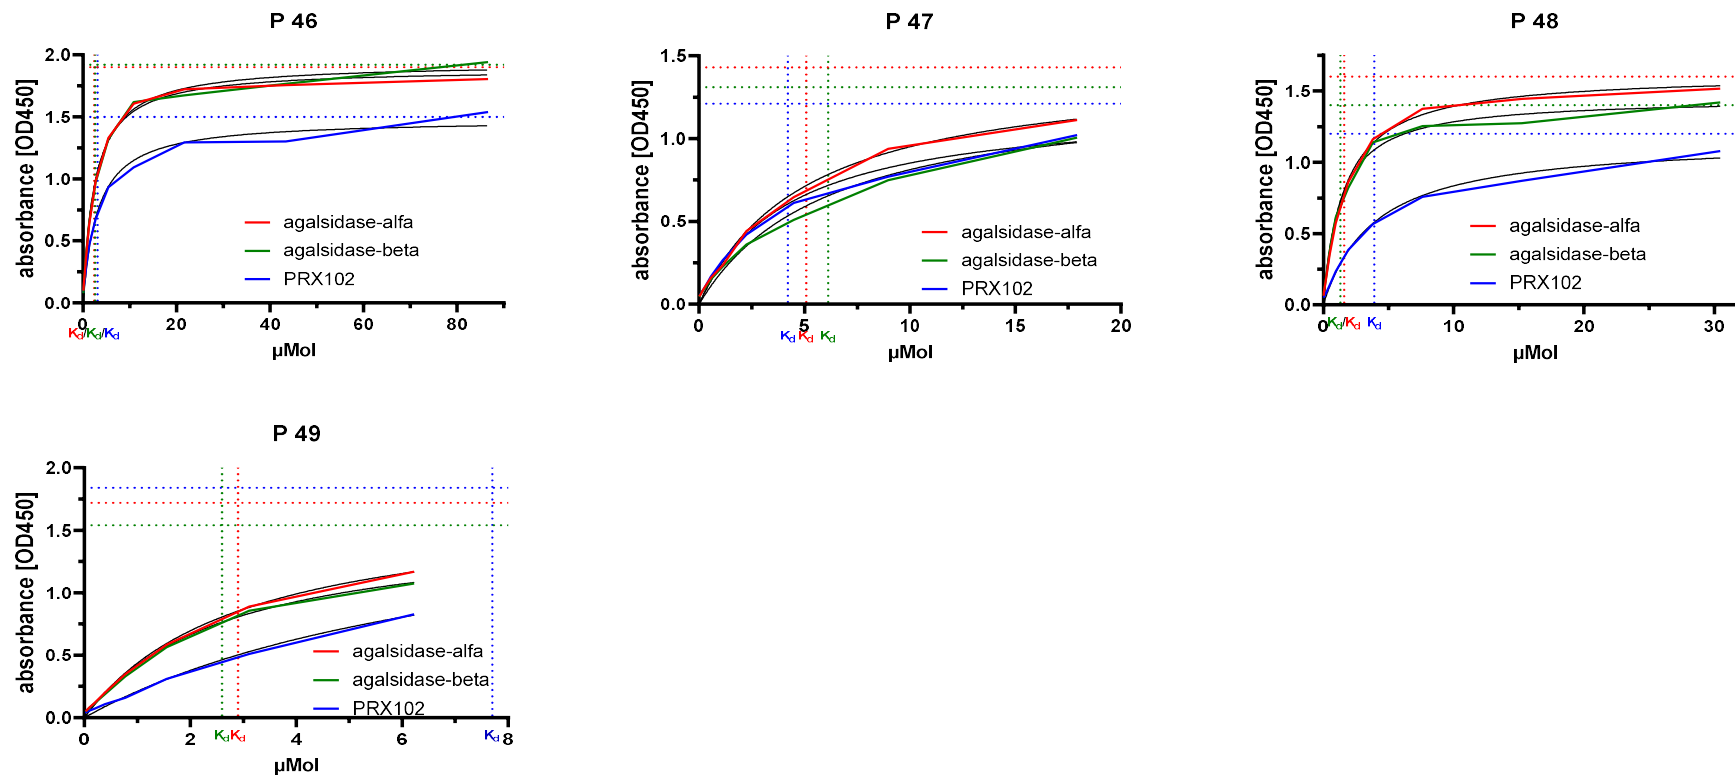

**Supplemental Figure 2: Individual ELISA-based affinity measures of pre-existing anti- $\alpha$ -galactosidase A antibodies against agalsidase-alfa, agalsidase-beta and pegunigalsidase-alfa. The horizontal lines mark respective B<sub>max</sub> values. PRX102: pegunigalsidase-alfa.**



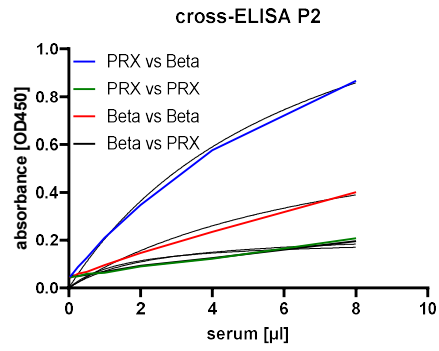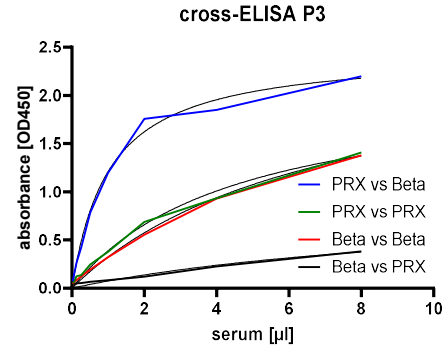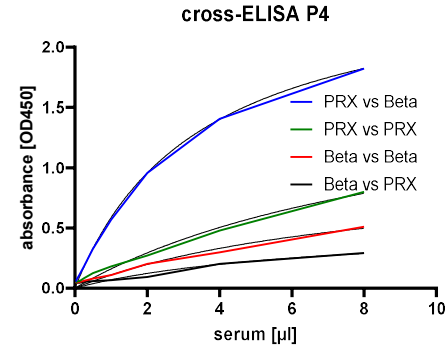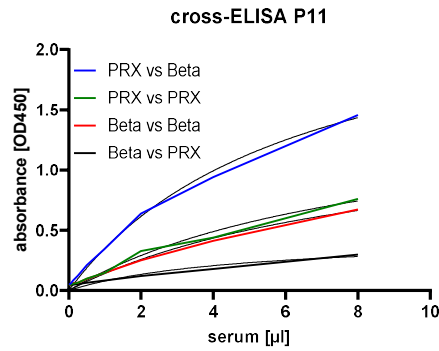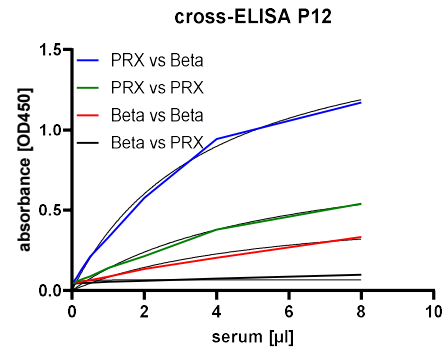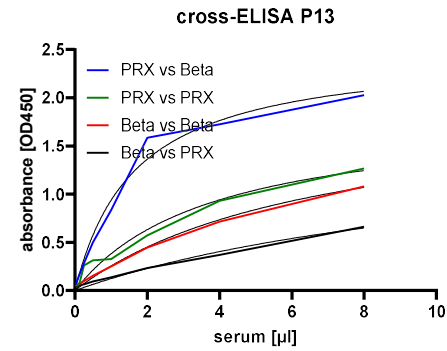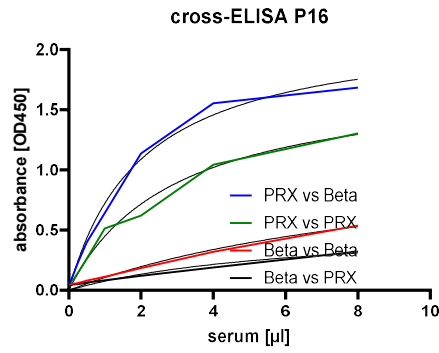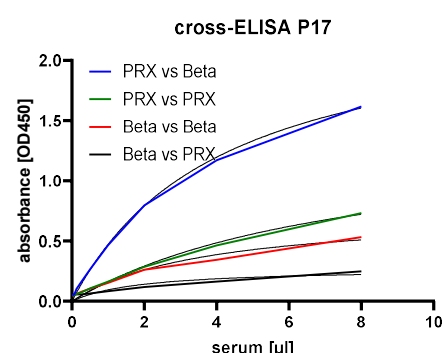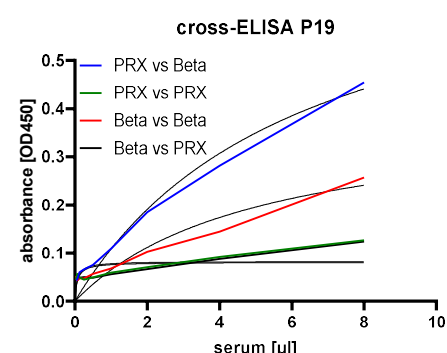

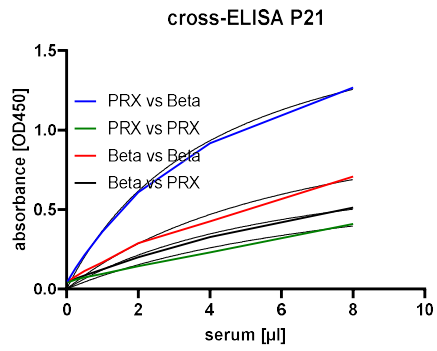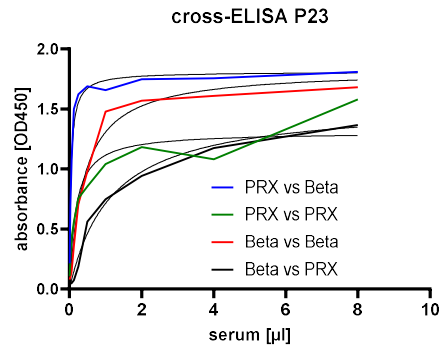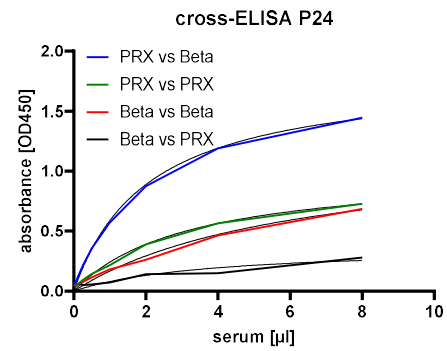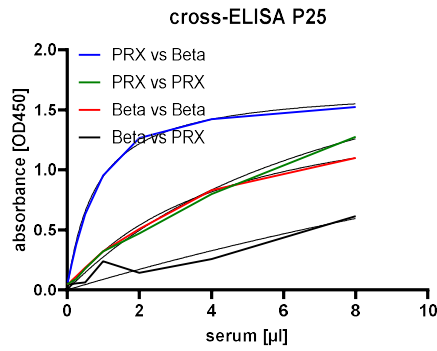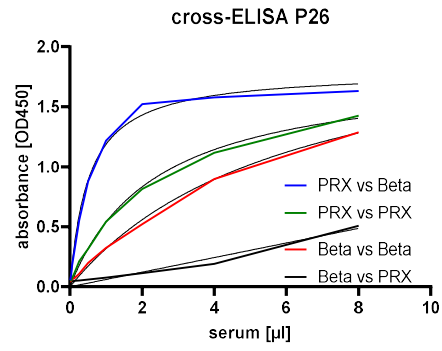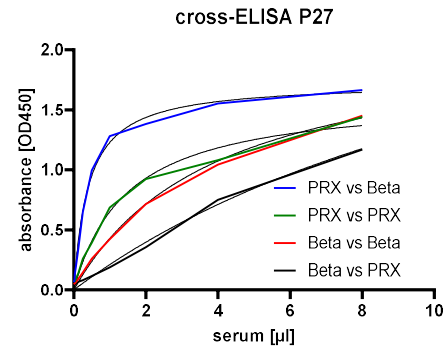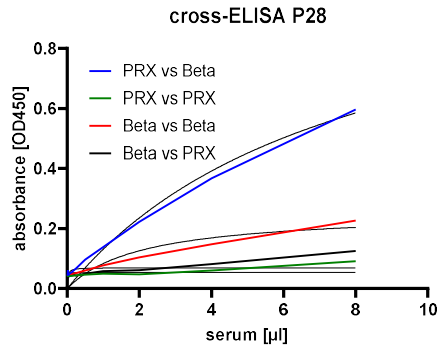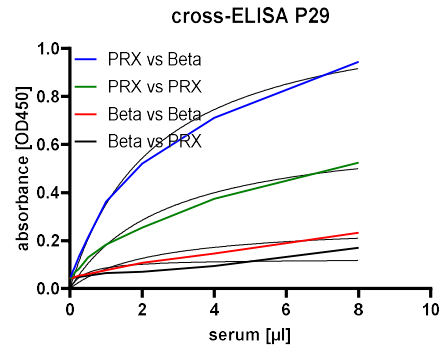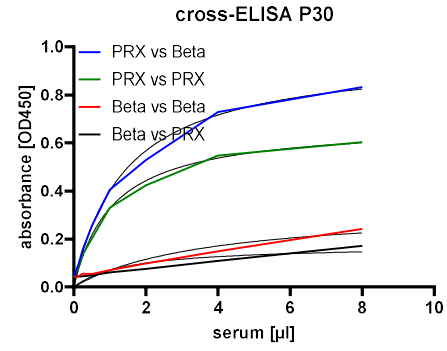

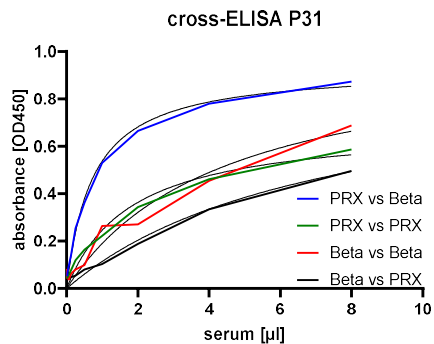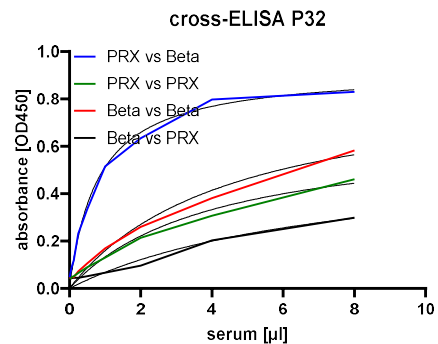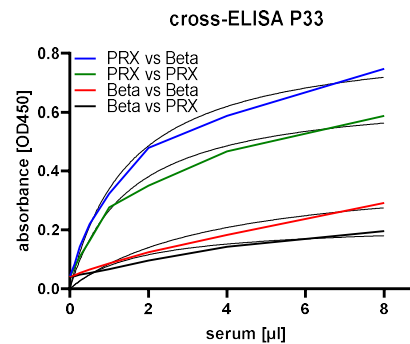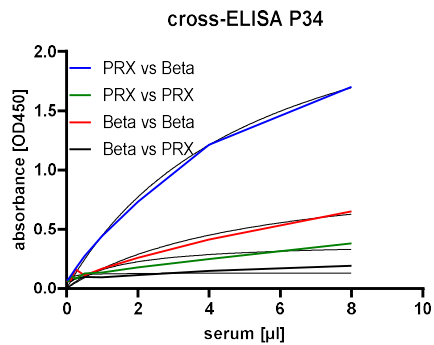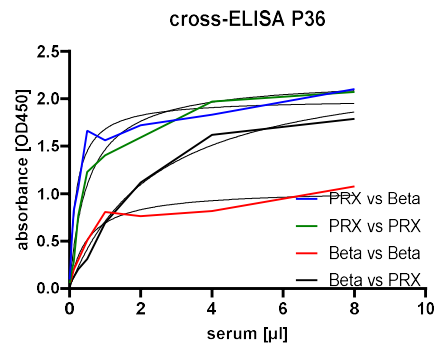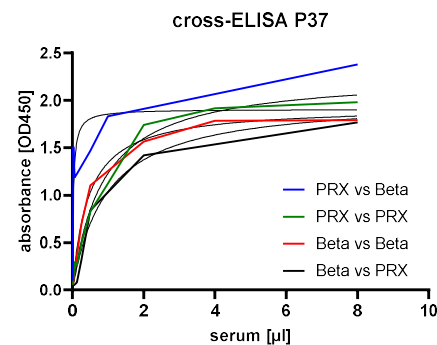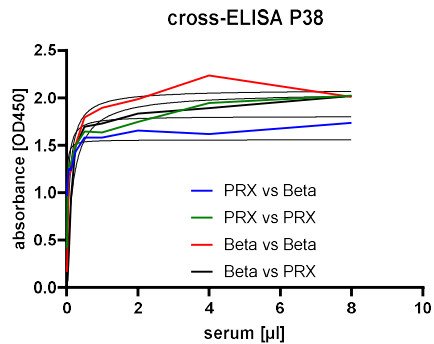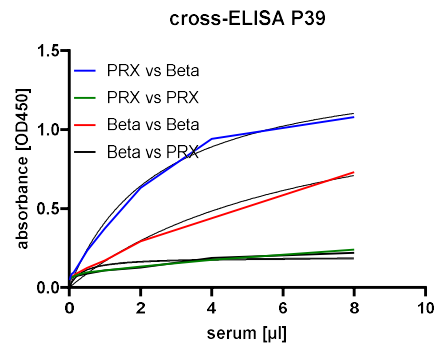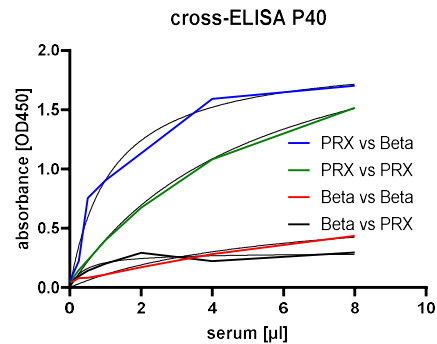

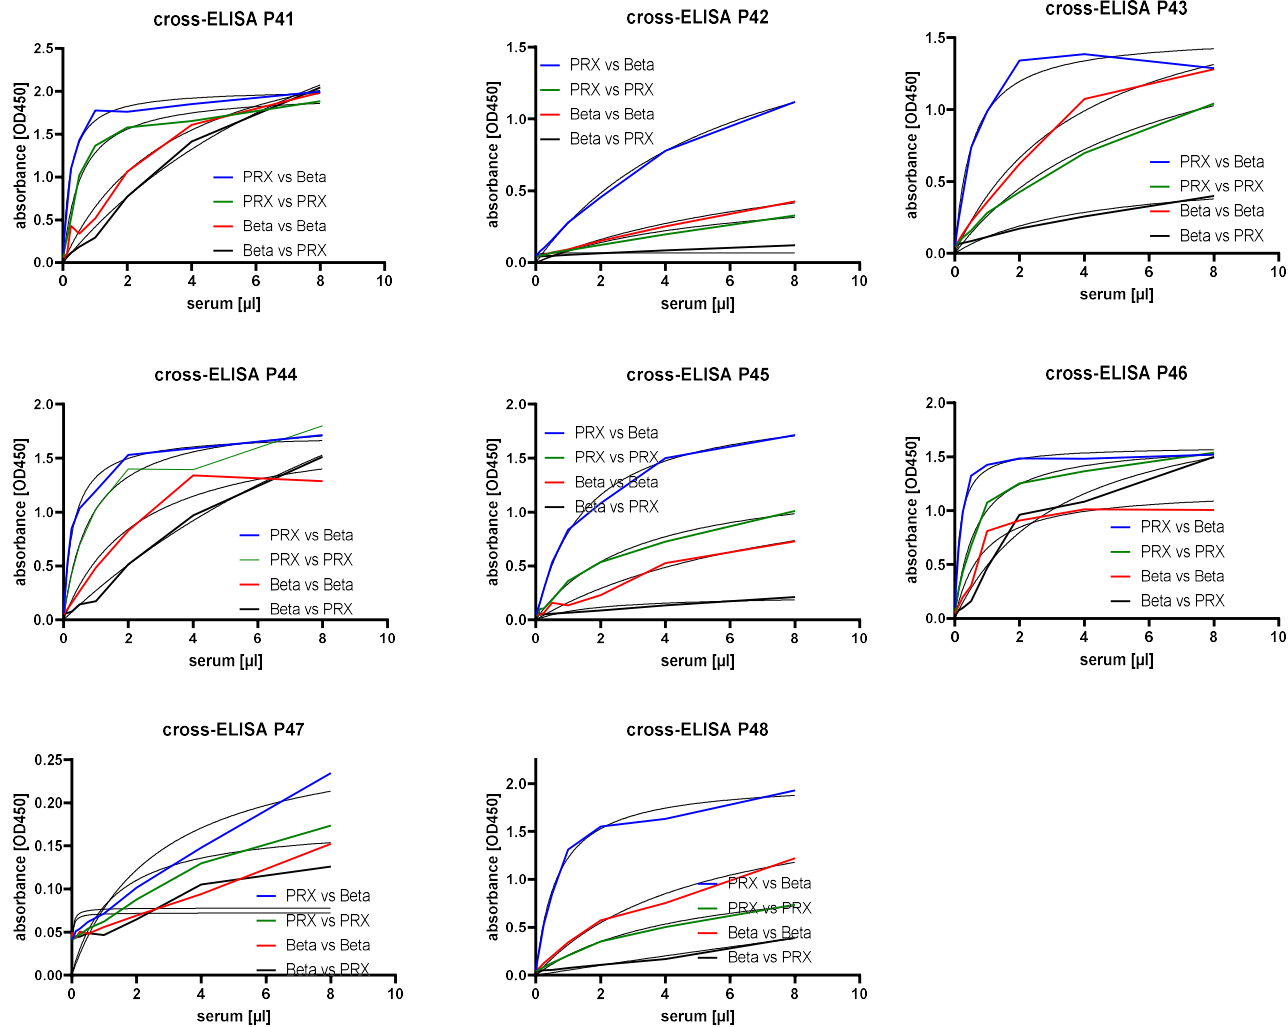

**Supplemental Figure 3: Individual cross-ELISAs versus agalsidase-beta and pegunigalsidase-alfa. Beta: agalsidase-beta, PRX: pegunigalsidase-alfa.**

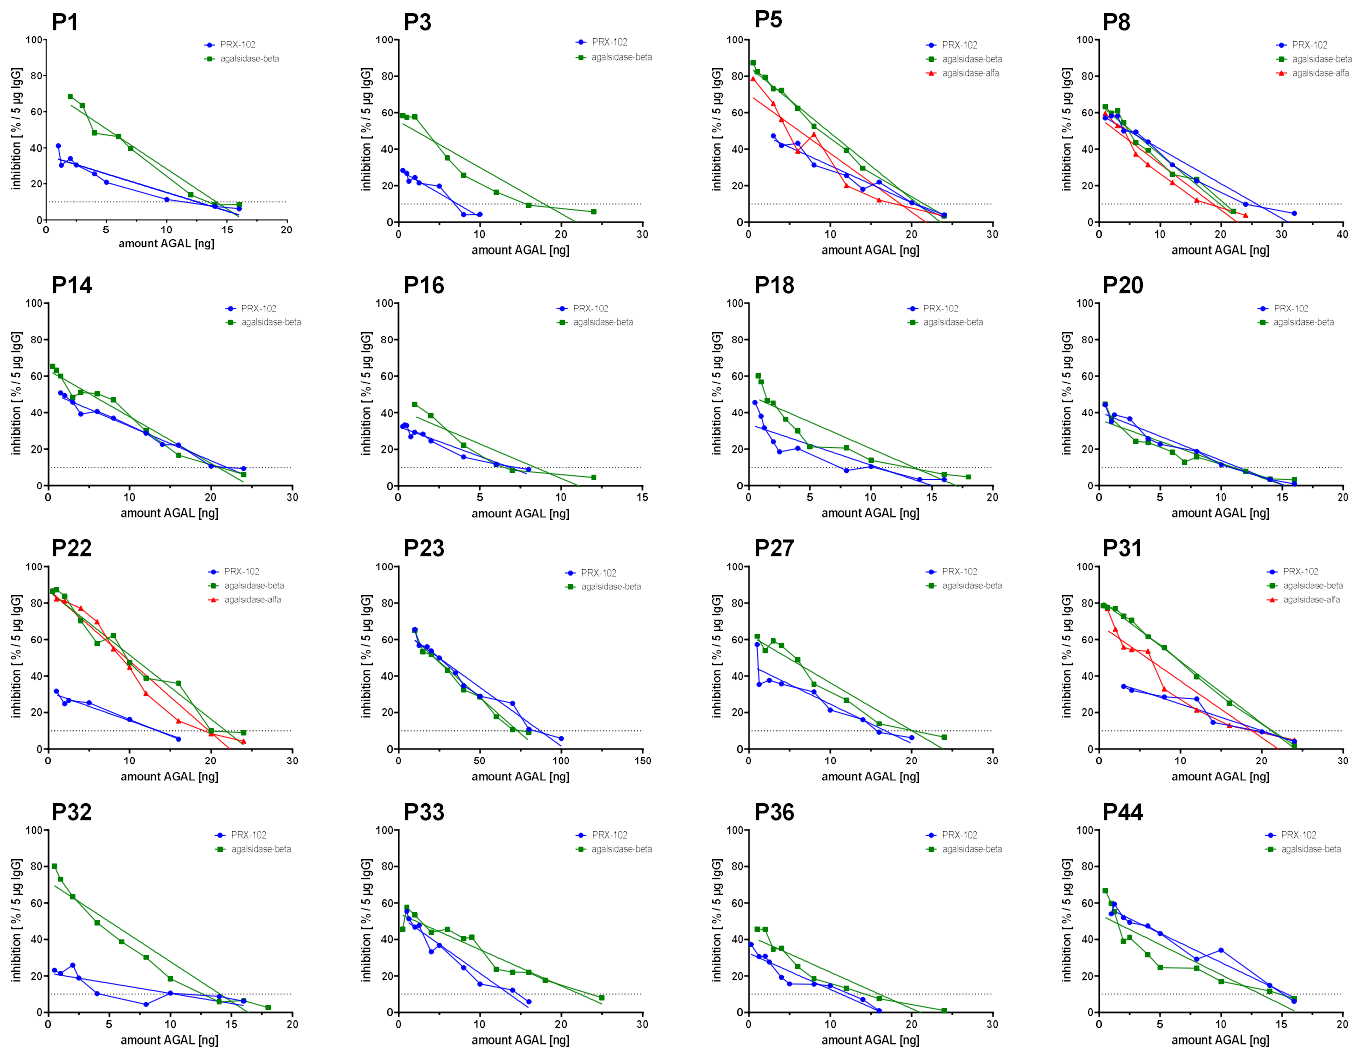

**Supplemental Figure 4: Individual titration curves to determine inhibitory capacities against AGALs.** The dotted line at 10% inhibition highlights the saturation cut off. AGAL:  $\alpha$ -galactosidase A, PRX-102: pegunigalsidase-alfa.
